# Supplementary material for: Decoding the Lifecycle Dynamics of Aerobic Granular Sludge: Quantifying Mechanisms of Stability and Disintegration
Source: Research Square preprint supplement (doi:10.21203/rs.3.rs-6831113/v1), 2025-06-27
Supplement: Supplementary file 1 [file ca0738906c49c662ead3882c.docx]

**Table S1** Fluorescent Staining Protocol for AGS Components.

| Staining Solution | Concentration | Volume | Incubation Time | Excitation (Ex) nm | Emission (Em) nm | Target Component |
| --- | --- | --- | --- | --- | --- | --- |
| Syto 63 | 20 μmol/L | 100 μL | 30 min | 633 | 650-700 | Total cells |
| FITC | 10 g/L | 10 μL | 60 min | 488 | 500-550 | Proteins |
| Con A | 250 mg/L | 100 μL | 30 min | 543 | 550-600 | α-polysaccharides |
| Calcofluor White | 300 mg/L | 100 μL | 30 min | 400 | 410-480 | β-polysaccharides |

**Table S2**-**S4** Specific oxygen uptake rate (SOUR) measurements and distribution of different respiratory patterns in FG, MG, and CG systems.

FG

| Respiration Type | SOUR (mg O2/(g MLSS·h)) | SD | CV (%) | R2 |
| --- | --- | --- | --- | --- |
| Total Respiration (SOURT) | 10.33 | 0.58 | 5.65 |  |
| Quasi-Endogenous Respiration (SOURQ) | 5.45 | 0.36 | 6.69 | 0.98 |
| Endogenous Respiration (SOURE) | 0.23 | 0.0013 | 5.73 | 0.92 |
| Heterotrophic Respiration (SOURH) | 3.09 | 0.29 | 9.43 | 0.97 |
| Autotrophic Respiration (SOURA) | 7.01 | 0.51 | 7.24 | 0.99 |

MG

| Respiration Type | SOUR (mg O2/(g MLSS·h)) | SD | CV (%) | R2 |
| --- | --- | --- | --- | --- |
| Total Respiration (SOURT) | 10.13 | 0.56 | 5.5 |  |
| Quasi-Endogenous Respiration (SOURQ) | 7.23 | 0.62 | 8.57 | 0.98 |
| Endogenous Respiration (SOURE) | 0.46 | 0.04 | 7.63 | 0.95 |
| Heterotrophic Respiration (SOURH) | 1.7 | 0.09 | 6.01 | 0.98 |
| Autotrophic Respiration (SOURA) | 7.96 | 0.55 | 8.31 | 0.97 |

CG

| Respiration Type | SOUR (mg O2/(g MLSS·h)) | SD | CV (%) | R2 |
| --- | --- | --- | --- | --- |
| Total Respiration (SOURT) | 10.74 | 0.55 | 5.12 |  |
| Quasi-Endogenous Respiration (SOURQ) | 7.34 | 0.59 | 7.9 | 0.99 |
| Endogenous Respiration (SOURE) | 1.83 | 0.15 | 8.01 | 0.93 |
| Heterotrophic Respiration (SOURH) | 1.96 | 0.11 | 5.62 | 0.98 |
| Autotrophic Respiration (SOURA) | 6.68 | 0.51 | 7.51 | 0.97 |

Note: The tables present measurements of different respiratory components including total respiration (SOURT), quasi-endogenous respiration (SOURQ), endogenous respiration (SOURE), heterotrophic respiration (SOURH), and autotrophic respiration (SOURA). Values are expressed in mg O2/(g MLSS·h). Statistical reliability is indicated by coefficient of variation (CV, %) and coefficient of determination (R2). All measurements were conducted under standardized conditions with reported standard deviations (SD). Significant variations were observed in heterotrophic and autotrophic respiration patterns across the three systems, while total respiration remained relatively stable.
